# Supplementary material for: Cause of Death, Mortality and Occult Blood in Colorectal Cancer Screening
Source: MDPI journal article supplement (doi:10.3390/cancers14010246), 2022-01-04
Supplement: s1 [file s1]

# Supplementary

## Supplementary tables

**Table S1.** Causes of death and the corresponding icd-8 and icd-10 classification codes.

| Cause of death                      | ICD-8 classification | ICD-10 classification                                                  |
|-------------------------------------|----------------------|------------------------------------------------------------------------|
| Colorectal cancer                   | 153-154              | C18-C20                                                                |
| Non-colorectal cancer               | 140-152, 155-209     | C00-C17, C21-C99                                                       |
| Cardiovascular disease              | 390-458              | I00-I99                                                                |
| Respiratory disease                 | 460-519              | J00-J99                                                                |
| Digestive disease                   | 520-577              | K00-K99                                                                |
| Endocrine and hematological disease | 280-289, 240-258     | D00-D99, E00-E99                                                       |
| Neuropsychological disease          | 290-358              | G00-G99                                                                |
| External conditions                 | 800-999              | S00-S99, T00-T99, U00-U99, V00-V99, W00-W99, X00-X99, Y00-Y99, Z00-Z99 |

**Abbreviations:** ICD, International Classification of Disease.

**Table S2.** Diseases and indications potentially contributing to digestive bleeding .

| Diseases And Indications      | ICD-8 classification | ICD-10 classification |
|-------------------------------|----------------------|-----------------------|
| Hemorrhage of anus and rectum | -                    | K625-K626             |
| Inflammatory Bowel Disease    | 561, 563             | K50-K52               |
| Diverticular disease          | 562                  | K57                   |
| Hemorrhoids                   | 455                  | I84                   |
| Colorectal fissures           | 565                  | K60                   |
| Gastrointestinal ulcers       | 531-534              | K25-K28               |
| Gastritis                     | 535                  | K29                   |

**Abbreviations:** ICD, International Classification of Disease.

**Table S3.** Cause of death, allowing for missing on education and income.

|                                          | Positive gFOBT<br>(n = 1,389) | Negative gFOBT<br>(n = 14,153) | HR (95% CI)      | P-value | aHR (95% CI)*    | P-value |
|------------------------------------------|-------------------------------|--------------------------------|------------------|---------|------------------|---------|
| All-cause mortality                      | 1389 (100.00)                 | 14,153 (100.00)                | 1.46 (1.37–1.56) | <0.001  | 1.25 (1.17–1.34) | 0.000   |
| All-cause excl. CRC                      | 1286 (92.58)                  | 13,722 (96.95)                 | 1.35 (1.26–1.45) | <0.001  | 1.16 (1.09–1.25) | 0.000   |
| Colorectal cancer                        | 103 (7.42)                    | 431 (3.05 )                    | 5.21 (4.10–6.63) | <0.001  | 4.48 (3.76–6.08) | <0.001  |
| Non-colorectal cancer                    | 353 (25.41)                   | 3729 (26.35)                   | 1.41 (1.24–1.61) | <0.001  | 1.24 (1.09–1.42) | 0.001   |
| Cardiovascular disease                   | 567 (40.82)                   | 5948 (42.03)                   | 1.48 (1.34–1.64) | <0.001  | 1.24 (1.12–1.37) | 0.000   |
| Respiratory disease                      | 323 (23.25)                   | 3264 (23.06)                   | 1.34 (1.16–1.54) | <0.001  | 1.13 (0.98–1.30) | 0.091   |
| Digestive disease                        | 78 (5.62)                     | 695 (4.91)                     | 1.15 (1.56–2.04) | 0.003   | 1.33 (1.00–1.78) | 0.048   |
| Endocrine and hemato-<br>logical disease | 110 (7.20)                    | 981 (6.93)                     | 1.64 (1.30–2.07) | 0.000   | 1.42 (1.12–1.79) | 0.003   |
| External conditions                      | 46 (3.31)                     | 548 (3.87)                     | 1.16 (0.80–1.70) | 0.435   | 1.01 (0.69–1.48) | 0.964   |

\*Adjusted for: Age, gender, income, education, bleeding at baseline, comorbidity at baseline. **Abbreviations:** gFOBT, guaiac fecal occult blood test; HR, Hazard Ratio; aHR, adjusted Hazard Ratio NB. Each participant may occur with more than one cause of death in this table.
